# Supplementary material
Source: publisher figshare collection journal article supplement (https://rs.figshare.com/ndownloader/files/20747481)
Supplement: Supplementary file 1 [file 20747481]

## Sheet: Sheet1
Table S13. Variation in symbiotic traits within sampled populations
Site	Inoc #	HGR	atm%15N	Nodule number	Mean individual nodule mass
Anza Borrego Desert State Park	157	446.296	0.6075	19.75b	0.3185a
	159	410.122	0.63985	27.25ab	0.2252ab
	160	200.355	0.95665	55.75a	0.145375b
	179	195.522	1.16223	23.5b	0.198625b
	180	285.497	1.3466	22.75b	0.16185b
Population analysis		F4,46 = 3.1265*	F4,16 = 2.4274	F4,16 = 4.0391*	F4,16 = 6.8198**
Bodega Marine Reserve
	2	83.881b	3.55328a	32.25ab	0.045075d
	18	558.269a	0.83825b	27b	0.185225abc
	38	318.925ab	1.11115b	40.75ab	0.1397abcd
	49	558.486a	0.73195b	23b	0.2529a
	56	540.737a	0.6514b	37.75ab	0.198875abc
	76	506.297a	0.60885b	49.5ab	0.227975ab
	132	220.53ab	0.8892b	37.75ab	0.130225bcd
	134	576.96a	0.5885b	60ab	0.1188bcd
	135	501.256a	0.8877b	74.75a	0.08095cd
	162	340.249ab	0.7003b	52.5ab	0.128875bcd
	163	476.47a	0.5842b	49.75ab	0.176525abc
Population analysis		F10,100 = 3.8390***	F10,34 = 41.7586****	F10,34 = 2.9538**	F10,34 = 6.3656****
Robert Bernard Field Station of the Claremont Colleges
	143	322.498ab	0.6637abc	45.75	0.182125bcd
	144	520.903ab	0.57913bc	57.5	0.15365bcd
	171	366.963ab	0.65348abc	42.75	0.15235bcd
	172	398.088a	0.53078c	45.5	0.183275bcd
	176	234.589b	0.62695abc	50.75	0.1176cd
	177	217.363b	0.98098ab	24.25	0.16185bcd
	178	215.07b	1.03915a	43.75	0.0949d
	CW5	426.991ab	0.69813abc	28	0.23368bc
	CW7	620.623ab	0.626abc	61.6	0.16046bcd
	CW8	602.063ab	0.58655bc	46.6	0.13468bcd
	CW9	772.204ab	0.60483bc	43.4	0.1753bcd
	CW10	471.394ab	0.5828bc	32.6	0.15876bcd
	CW11	337.373ab	0.7236abc	39.4	0.14828bcd
	CW12	309.002ab	0.73773abc	27.5	0.163525bcd
	CW13	446.112ab	0.66393abc	31.8	0.24626b
	CW14	428.376ab	0.72485abc	38.2	0.23092bc
	CW15	240.035ab	0.71035abc	30.4	0.1267bcd
	CW16	553.014ab	0.70933abc	28.8	0.36742a
Population analysis		F17,107 = 2.1344*	F17,55 = 2.5618**	F17,65 = 1.6017	F17,65 = 6.6151****
Griffith Park
	137	551.304	0.685075	54.25	0.1421
	138	642.398	0.562325	52	0.152375
	139	401.687	0.74595	49.75	0.112
	141	640.851	0.527075	51.25	0.14015
Population analysis		F3,38 = 1.0572	F3,13 = 2.1279	F3,13 = 0.0445	F3,13 = 2.1276
Motte Rimrock Reserve
	166	366.538	0.679075	49.75	0.1169
	167	368.157	0.778475	65	0.113825
	168	304.961	0.7659	69.25	0.099125
	169	355.905	0.64015	60	0.122525
Population analysis		F3,37 = 0.2142	F3,13 = 0.4549	F3,13 = 0.6060	F3,13 = 0.8231
Pismo Dunes Natural Preserve
	190	218.85ab	0.8105b	47.25a	0.121575a
	191	387.5a	0.6189b	46a	0.1338a
	192	266.99ab	0.7668b	45.75a	0.1604a
	197	103.6bc	0.9783b	46.5a	0.108425a
	198	122.65bc	0.76605b	39.25ab	0.13325a
	200	-13.6907c	3.58256a	14.78b	0.015338b
Population analysis		F5,52 = 7.4856****	F5,19 = 70.5167****	F5,24 = 4.6604**	F5,23 = 26.7590****
San Dimas Canyon
	170	358.628ab	0.68898c	28.75	0.19995a
	173	294.303abc	0.7213c	62.5	0.12255b
	174	500.264a	0.52378c	61	0.15435ab
	175	284.575abc	0.65803c	72.75	0.14505ab
	185	205.287abc	0.82578c	70.25	0.14355ab
	186	14.558bc	2.13945b	41.75	0.0928bc
	187	16.994c	3.089a	73	0.039825c
	188	218.478abc	0.58313c	46	0.137275ab
	189	206.375abc	0.73603c	75.25	0.11825b
Population analysis		F8,76 = 3.8592***	F8,28 = 26.0687****	F8,28 = 1.5611	F8,28 = 9.3823****
Univeristy of California Riverside
	87	422.432ab	0.7477b	45.5	0.1485bc
	131	620.455a	0.6739b	53.25	0.174625b
	147	488.946ab	0.55298b	43	0.184425b
	150	262.565b	1.0395ab	31	0.162125bc
	164	275.039b	0.6906b	34.25	0.27975a
	165	368.853ab	0.61183b	35	0.15955bc
	CW1	55.557b	1.42273a	42.5	0.075775c
	CW3	436.058ab	0.59508b	55.2	0.13434bc
	CW4	448.086ab	0.634b	59.8	0.12802bc
Population analysis		F8,65 = 3.3505**	F8,28 = 6.8760****	F8,30 = 1.1827	F8,30 = 7.8331****
Whitewater Preserve
	193	331.308a	0.66815	81.25	0.119175
	194	143.884b	0.99305	46	0.137375
	195	317.057a	0.54608	35	0.141175
	196	99.635b	1.07133	47	0.1207
Population analysis		F3,36 = 7.0482***	F3,13 = 3.4595	F3,13 = 1.7051	F3,13 = 0.8591
Burns Piñon Ridge Reserve near Yucca Valley
	153	277.273abc	0.77048b	36.75	0.164825
	154	378.534ab	0.76213b	25.5	0.2091
	155	5.165c	2.25763a	72.5	0.1031
	156	140.924bc	1.16908b	51.75	0.1511
	181	270.639abc	0.7392b	22.75	0.322575
	182	413.093ab	0.7856b	32.25	0.18065
	183	250.27abc	0.90488b	32.5	0.106925
	184	225.644abc	0.80135b	31.25	0.13215
	CW17	548.201a	0.67555b	33.6	0.20226
Population analysis		F8,75 = 5.1091****	F8,28 = 12.3955****	F8,29 = 2.0225	F8,29 = 1.9935
Asterisks indicate significant differences among isolates via one-way ANOVAs: *P < 0.05. **P < 0.01, ***P < 0.001, ****P < 0.0001. Significnat F values were followed by Tukey's HSD test. Letter superscripts indicate differences in pairwise comparisons (P < 0.05).
